## 1 Comment on ‘*Fruitless* mutant male mosquitoes gain attraction to human odor’

2

3 Brogan A. Amos<sup>1</sup>, Ary A. Hoffmann<sup>2</sup>, Kyran M. Staunton<sup>1</sup>, Meng-Jia Lau<sup>2</sup>, Thomas R. Burkot<sup>1</sup>, Perran A.  
4 Ross<sup>2</sup>

5

6 <sup>1</sup>Australian Institute of Tropical Health and Medicine, James Cook University, Cairns, Queensland,  
7 Australia

8 <sup>2</sup>Pest and Environmental Adaptation Research Group, Bio21 Institute and the School of BioSciences, The  
9 University of Melbourne, Parkville, Victoria, Australia

10

### 11 **Abstract**

12 Female *Aedes aegypti* mosquitoes integrate multiple sensory cues to locate human hosts for blood  
13 meals. While male mosquitoes do not blood feed, male *Ae. aegypti* swarm around and land on humans  
14 in nature. Basrur et al. (2020) generated male *Ae. aegypti* lacking the *fruitless* gene and discovered that  
15 they gained strong attraction to humans, similar to female mosquitoes. The authors assume that host-  
16 seeking is a female-specific trait. However, all experiments were performed under confined laboratory  
17 conditions which are unable to detect long-range attraction. We used semi-field experiments to  
18 demonstrate robust attraction of male *Ae. aegypti* to humans. Our observations refute a key assumption  
19 of Basrur et al. (2020) and raise questions around conditions under which *fruitless* prevents male host-  
20 seeking. Male mosquito attraction to humans is likely to be important for mating success in wild  
21 populations and its basis should be further explored.

22

23

### 24 **Introduction**

25 *Aedes aegypti* female mosquitoes are strongly anthropophilic (Harrington et al., 2001, McBride et al.,  
26 2014). Human skin odors, exhaled CO<sub>2</sub>, body heat and visual contrast all act as signals for female  
27 mosquitoes to find blood meal hosts (Liu and Vosshall, 2019). Although male mosquitoes do not blood  
28 feed, they have sophisticated olfactory systems (Wheelwright et al., 2021) used to locate female  
29 mosquitoes (Cator et al., 2009, Menda et al., 2019), nectar and other sugar sources (Barredo and  
30 DeGennaro, 2020), and conspecific males (Cabrera and Jaffe, 2007, Fawaz et al., 2014, Pitts et al., 2014).

31 Growing evidence demonstrates that male *Aedes* mosquitoes are attracted to humans despite it not  
32 being necessary for them to blood feed. Field observations report males swarming around and landing  
33 on humans (Banks, 1908, Hartberg, 1971, Yasuno and Tonn, 1970, Cator et al., 2011, Trpis et al., 1973,  
34 Lumsden, 1957, McClelland, 1960, Gubler and Bhattacharya, 1972). Furthermore, male *Aedes* capture  
35 rates increase when traps are baited with CO<sub>2</sub> and human odor mimics (Pombi et al., 2014, Amos et al.,  
36 2020, Roiz et al., 2015, Visser et al., 2020). In a pilot experiment, Lau et al. (2020) demonstrated rapid

37 attraction of males to humans under semi-field conditions. While males and females show similar rates  
38 of attraction to humans, sex-specific behaviors exist, with males typically swarming around humans  
39 without landing. Swarming *Ae. aegypti* males fly in a characteristic figure 8 pattern around humans. This  
40 behavior is likely to increase their reproductive success as they intercept and mate with host-seeking  
41 females (Hartberg, 1971, Cator et al., 2011, Cabrera and Jaffe, 2007).

42 In a recent paper, Basrur et al. (2020) claim that only female *Aedes aegypti* mosquitoes host-seek, but  
43 removal of the *fruitless* gene in males activates host-seeking behavior in male *Ae. aegypti*. Their  
44 conclusions are based on laboratory experiments, which often fail to detect male attraction to human  
45 host cues (Peach et al., 2019, van Breugel et al., 2015, McMeniman et al., 2014). The authors  
46 acknowledge some field observations but argue that they are confounded by the presence of female  
47 mosquitoes. We therefore performed experiments under semi-field conditions and demonstrate  
48 conclusively that male *Ae. aegypti* are attracted to humans in the absence of female mosquitoes.

49

## 50 **Results and discussion**

### 51 **Male *Aedes aegypti* show long-range attraction to humans under semi-field conditions**

52 We tested male mosquito attraction to humans under semi-field conditions using paired human-baited  
53 and unbaited traps within the same enclosure (Figure 1A). Male *Ae. aegypti* were released at a central  
54 point in the enclosure and recaptured or observed by videography at human-baited and unbaited  
55 stations. In these experiments, other objects in the semi-field cage that could potentially act as swarm  
56 markers were removed prior to initiating experiments.

57 In a pilot experiment, we released 100 males (Figure 1B) and recaptured them using male *Aedes* sound  
58 traps (MASTs) (Staunton et al., 2021). After 15 min, we found that MASTs baited with a human subject  
59 sitting over the trap captured 14% (median) of males, while no mosquitoes were captured by unbaited  
60 MASTs (Figure 1B). In a second experiment using 20 males, human-baited traps captured up to 25%  
61 (median 5%) of the released males (Figure 1B). In contrast, no mosquitoes were captured by unbaited  
62 MASTs in all 16 replicates (Figure 1B). Differences in capture rates between human-baited and unbaited  
63 traps were significant according to a Wilcoxon signed-rank test ( $Z = 2.821$ ,  $P = 0.005$ ). Capture rates may  
64 underrepresent male attraction to humans since we observed many males swarming near the human  
65 subject that were not captured. Capture rates were higher when larger numbers of males were  
66 released, suggesting a potential effect of conspecific attraction. However, while swarming activity may  
67 increase when larger numbers of males are present, the location of males is clearly influenced by the  
68 location of the human subject.

69

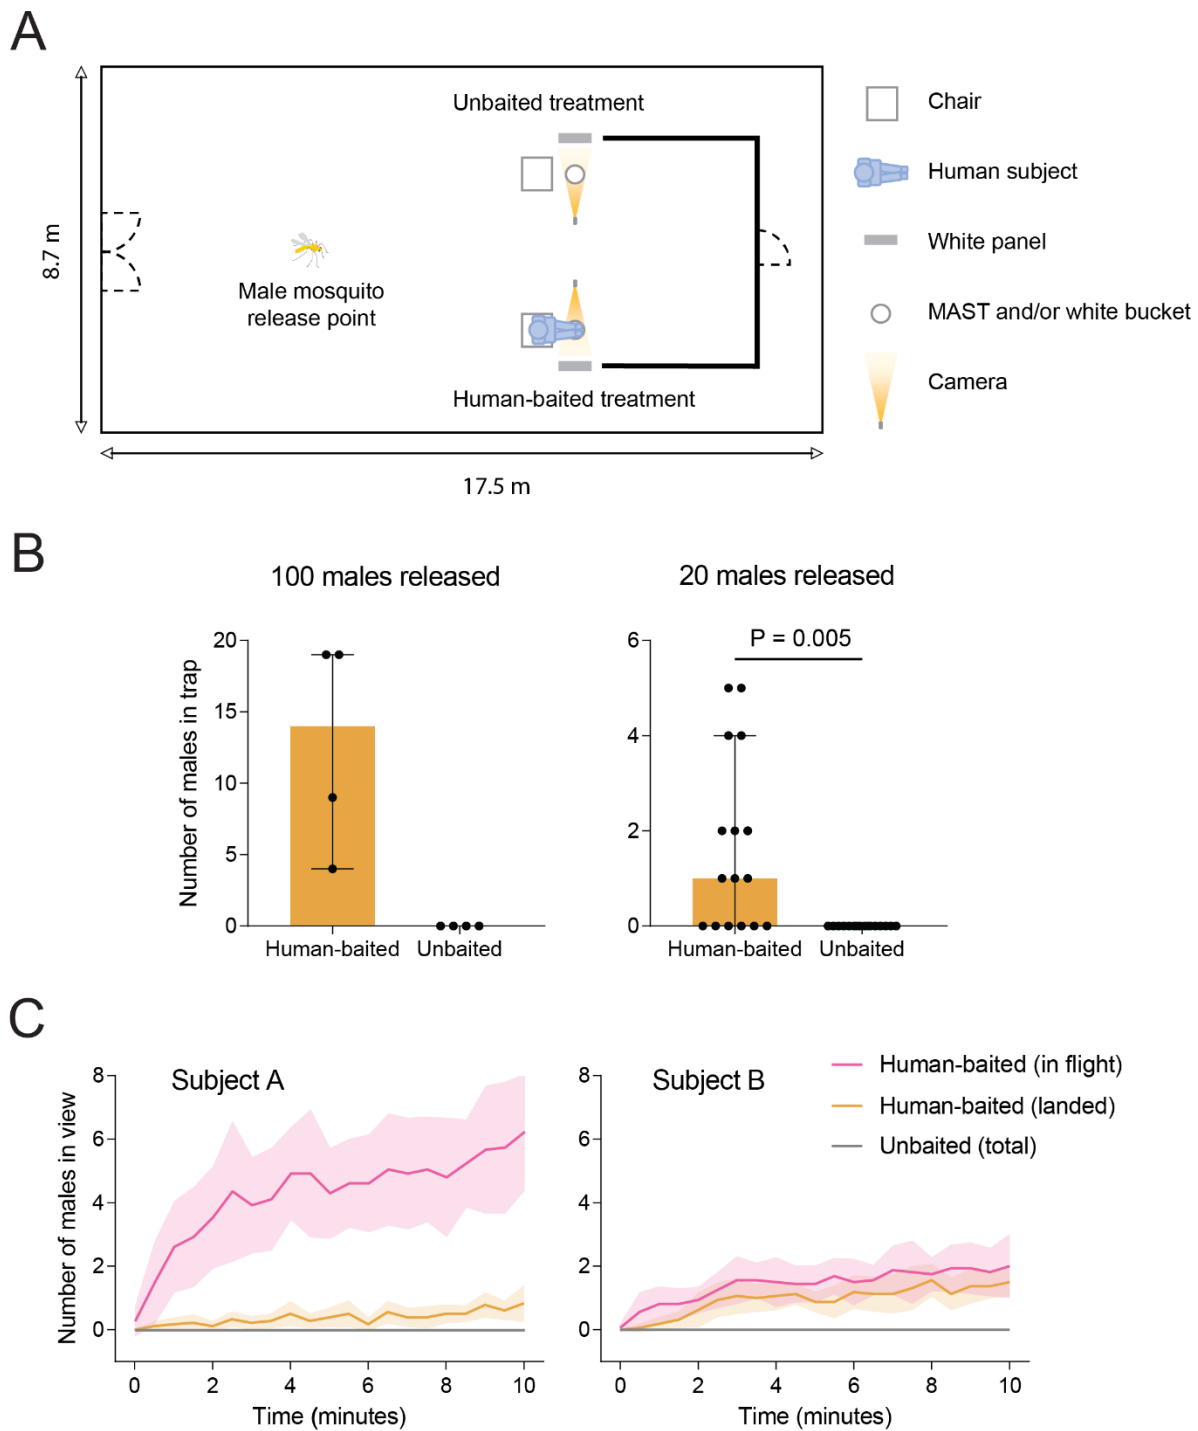

70

71 **Figure 1. Male *Aedes aegypti* mosquitoes locate, swarm around and land on human subjects.** (A)  
72 Layout of semi-field enclosure, showing the locations of human-baited and unbaited treatments for  
73 MAST (B) and videography (C) trials. (B) Number of males caught by human-baited and unbaited MASTs  
74 in 15 min when either 100 or 20 mosquitoes were released into the semi-field cage. Bars represent  
75 medians with dots showing data from individual replicate trials. Error bars are 95% confidence intervals.

76 (C) Males in view of cameras in human-baited (colored lines) and unbaited (gray lines) treatments at  
77 30 s intervals. Experiments were performed with two human subjects (n = 16 replicate trials per  
78 subject). Pink lines represent males in flight while orange lines show males that had landed on the  
79 human subject or the footrest. Means are shown with shaded regions representing 95% confidence  
80 intervals.

81

82 MASTs were unable to capture many of the swarming males and the sound lures within the MASTs  
83 could plausibly influence their attraction to humans. We therefore performed a second experiment  
84 using videography to quantify male *Ae. aegypti* attraction to humans without traps. Human subjects  
85 rested their bare feet in front of a video camera facing a white plastic panel (Figure 1A). A paired  
86 treatment without a human subject was set up on the opposite side of the semi-field cage. We  
87 quantified attraction by counting the number of mosquitoes within the field of view of each camera  
88 (Video 1). Male mosquitoes began swarming almost immediately and occasionally landed on the  
89 subjects (Figure 1C), consistent with observations of male swarming in nature (Hartberg, 1971, Cator et  
90 al., 2011). The number of males observed in flight or landing increased over time, exceeding 10% after  
91 10 min for subject A. Fewer males were viewed in flight around subject B, but differential attractiveness  
92 of humans to male mosquitoes is consistent with observations of females (Martinez et al., 2021). The  
93 number of males observed in human-baited treatments after 10 min was significantly higher than in  
94 unbaited treatments for both human subjects (Wilcoxon signed-rank test: Subject A (in flight):  $Z = 3.535$ ,  
95  $P < 0.001$ , Subject A (landed):  $Z = 2.751$ ,  $P = 0.006$ , Subject B (in flight):  $Z = 3.077$ ,  $P = 0.002$ , Subject B  
96 (landed):  $Z = 3.482$ ,  $P < 0.001$ ). Attraction rates are likely underestimated since some males within the  
97 vicinity of subjects were outside the field of view of the camera. Importantly, no mosquitoes were  
98 observed in the unbaited treatments for either subject (Figure 1C). These experiments demonstrate  
99 attraction of male *Ae. aegypti* to humans, in direct contrast to the claim by Basrur et al. (2020) that only  
100 female mosquitoes host-seek.

101

102

### 103 **Male *Aedes aegypti* mosquitoes are not attracted to humans under confined laboratory conditions**

104 The Liverpool strain of *Ae. aegypti* used by Basrur et al. (2020) has been maintained in the laboratory for  
105 at least 80 years (Kuno, 2010) and may not be representative of wild mosquito populations. Laboratory  
106 populations of *Ae. aegypti* are typically kept in small cages with males having constant access to  
107 females, likely reducing selective pressures to maintain attraction to humans. Adaptation to laboratory  
108 conditions is therefore a plausible explanation for the lack of male host-seeking observed by Basrur et al.  
109 (2020).

110 We tested whether recently collected male *Ae. aegypti* from the field ( $F_3$  and  $< 6$  months in the  
111 laboratory) are attracted to humans under laboratory conditions using a two-port olfactometer ( $30 \times 30$   
112  $\times 30$  cm, Figure 2A). Males, females or both males and females were released into a cage and collected  
113 in unbaited or human-baited traps. Females showed strong attraction to humans, with  $>60\%$  being  
114 collected in human-baited traps after 5 min (Figure 2B). The number of females caught in human-baited

115 traps was higher than in unbaited controls (Wilcoxon signed-rank test: females only:  $Z = 2.521$ ,  $P =$   
116  $0.012$ , females + males:  $Z = 2.524$ ,  $P = 0.012$ ). Rates of attraction were similar regardless of whether  
117 males were present in the same cage. In contrast to females, no males were captured in human-baited  
118 traps in any treatment (Figure 2C). Few mosquitoes were attracted to blank ports across all treatments  
119 (Figure 2B, 2C). These results are consistent with those of Basrur et al. (2020) and further demonstrate  
120 that *Ae. aegypti* show sexually dimorphic attraction to humans at close range.

121

122

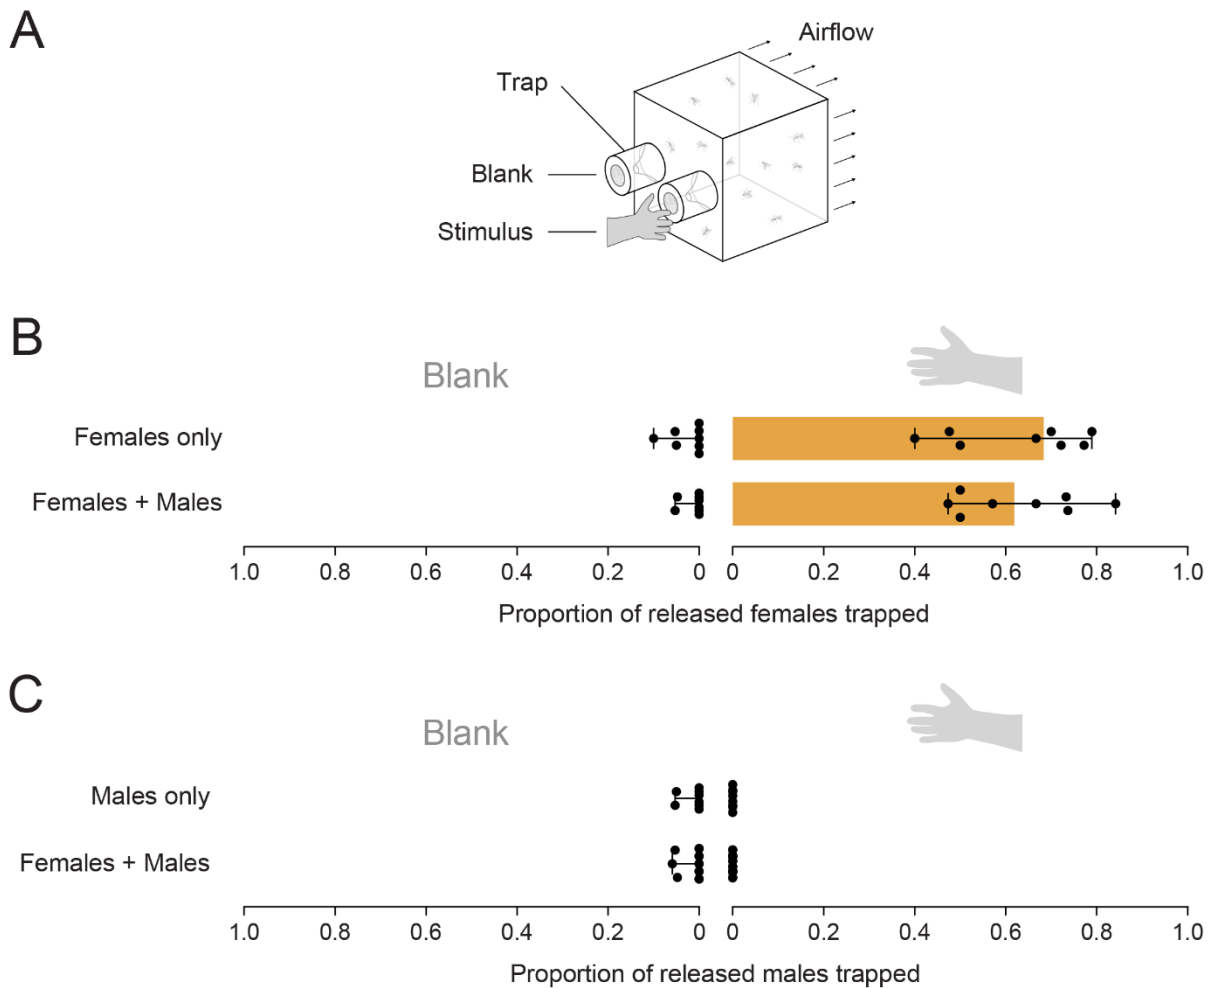

123

124 **Figure 2. Male *Aedes aegypti* mosquitoes are not attracted to humans under confined laboratory**  
125 **conditions.** (A) Diagram of two-port olfactometer. Mosquitoes were released into the cage and  
126 collected by one of two traps after 5 min. Traps were either unbaited (blank) or baited with the palm of  
127 a human subject (stimulus). (B-C) Proportions of released (B) females and (C) males attracted to a  
128 human hand or unbaited trap ( $n = 8$  replicate trials each for females only, males only and females +  
129 males). Bars represent median trap proportions with dots showing proportions from individual replicate  
130 experiments. Error bars are 95% confidence intervals.

131

132 We demonstrate that male *Ae. aegypti* mosquitoes are attracted to humans in open spaces, but not  
133 under confined conditions using a port of entry assay. Our work highlights how assays performed at  
134 different scales can lead to opposing conclusions, likely because they are measuring different aspects of  
135 mosquito behavior (e.g. McMeniman et al. (2014)). In their discussion, Basrur et al. (2020) acknowledge  
136 that wild-type male mosquitoes may show some attraction to humans, but their conclusions are based  
137 on a lack of attraction in wild-type males. While we appreciate that the *fruitless* gene could contribute  
138 to sex-specific host-seeking behaviors at close range or even influence the strength of attraction to  
139 humans, our work shows that attraction to humans is already a characteristic of wild-type males. It will  
140 be interesting to explore the impact of *fruitless* in larger arenas; we predict that *fruitless* mutant males  
141 would land on humans more frequently than wild-type males under semi-field conditions.

142 Our study will help to inform the design of future laboratory-based behavioral assays for male *Ae.*  
143 *aegypti*. Further research is required to determine which host cues attract males at long distances. Male  
144 attraction to humans has important implications for mosquito control, particularly for mass-releases of  
145 males for mosquito population suppression (Crawford et al., 2020, Carvalho et al., 2015), where  
146 released male mosquitoes are likely to be regarded as a nuisance by residents in intervention areas.  
147 Human host odors show potential as lures for traps used as vital monitoring tools in these programs,  
148 particularly in combination with sound lures.

149

## 150 **Materials and methods**

151

### 152 **Mosquito strains and maintenance**

153 *Aedes aegypti* colonies were collected from the field in Cairns (Queensland, Australia) in January 2021.  
154 Mosquitoes used in all experiments ranged from F<sub>1</sub> to F<sub>3</sub>. Laboratory colonies were maintained at 27 ±  
155 1°C, 70% RH with 12:12 (L:D) h regime. Adults were provided with a honey/water solution (50:50) and  
156 were blood fed using human volunteers (Human ethics approval from James Cook University H4907 and  
157 The University of Melbourne 0723847). Eggs were collected and allowed to embryonate for 3 d before  
158 being stored in air-tight containers for up to 2 mo. Eggs were hatched in water containing 0.2 g bakers'  
159 yeast (Lowan Whole Foods, Glendenning NSW, Australia) per liter. Mosquito larvae were reared on fish  
160 food powder (TetraMin Tropical Flakes Fish Food, Tetra, Melle, Germany). Pupae were sexed and  
161 transferred to clear plastic containers (300 ml) covered with a white mesh cloth (0.5 mm pore size) with  
162 a sponge on top (30 × 40 mm<sup>2</sup>) soaked with honey/water solution (50:50).

163

164

### 165 **Semi-field experiments**

166

167 We tested male mosquito attraction to humans under semi-field conditions through two approaches. In  
168 the first approach, we captured mosquitoes with male *Aedes* sound traps (MASTs) (Staunton et al.,

169 2021) that were unbaited or baited with a human subject sitting near the trap entrance. In the second  
170 approach, we used videography to quantify male swarming and landing in the vicinity of a human  
171 subject, compared to an unbaited control on the other side of the cage. Experiments in semi-field cages  
172 were conducted during daylight hours in March and April, 2021. The experimental arena measures 17.5  
173 × 8.7 m and is described in detail by Ritchie et al. (2011). Competing visual stimuli in the semi-field cage  
174 were minimized (e.g., dark-colored objects were covered with lighter-colored materials). Nitrile gloves  
175 were worn when handling objects and frequently touched objects (e.g., door handles) were regularly  
176 wiped with EtOH (80%) throughout the experimental period to minimize human odor interference. Male  
177 mosquitoes used in semi-field experiments were unmated, between 2- and 7-d post-emergence. All  
178 human subjects acting as lures wore light-colored clothing, minimized movement, and refrained from  
179 using perfumed products 24 h before and during the trials.

180

### 181 *MAST trials*

182 MASTs use sound frequencies which mimic female mosquito flight tones to capture male *Ae. aegypti*  
183 (Staunton et al., 2021). MAST trials involved two paired treatments within the same semi-field cage  
184 (Flight cage B). MASTs were cleaned with EtOH (80% aqueous solution) to remove potential human skin  
185 odors before use and thereafter only handled with nitrile gloves. The black MAST bases (which act as  
186 swarm markers) were not used in these trials. Instead, MAST heads (the capture container components  
187 of the trap system which include the sound lures) were placed on upturned white plastic buckets (3L)  
188 such that they were 15 cm above the ground. MASTs were placed 5.5 m apart outside of a structure  
189 built to resemble the downstairs area of a traditional house in Queensland. A white plastic and metal  
190 chair was placed over each trap. A human (subject A in the below experiment) acting as bait sat in one  
191 chair, with the other left empty, with the positions of human-baited and unbaited treatments swapping  
192 each replicate. Male *Ae. aegypti* were released remotely at a central location in the cage approximately  
193 6 m from the traps. We ran 4 replicate trials with 100 males at sound lure settings of 495 Hz, continuous  
194 tone (volume level 1), and 16 replicate trials with 20 males at sound lure settings of 550 Hz, continuous  
195 tone (volume level 2). Trials ran for 15 min and mosquitoes captured by the MAST were counted, with  
196 an equal number of new males released between each replicate. Numbers of males captured by human-  
197 baited and unbaited MASTs were compared using Wilcoxon signed-rank tests. All data were analyzed  
198 using SPSS statistics version 24.0 for Windows (SPSS Inc, Chicago, IL).

199

### 200 *Videography*

201 Videography trials involved two paired treatments on opposite sides of flight cage A (3.2 m apart)  
202 (Figure 1A). Two cameras (Professional Series Motorised Bullet 8MP cameras (VIP Vision™)) were  
203 installed at ground level facing upturned plastic white (3L) buckets in front of white corrugated plastic  
204 panel (600 x 800 x 5 mm; Corex Plastics Australia Pty. Ltd.). In the human-baited treatment, a human  
205 subject sat on a white plastic and metal chair and placed their bare feet on the bucket for the duration  
206 of each trial. Unbaited treatments were set up identically to human-baited treatments, but on the  
207 opposite side of the cage and without a human subject. Two subjects were used, subject A (female,  
208 Caucasian, age 32) and subject B (male, Caucasian, age 29), and the position of human-baited and

209 unbaited treatments was swapped each replicate (n = 16 replicate trials per subject). Before trials  
210 commenced, 50 male *Ae. aegypti* were released remotely at a central location in the cage once per day.  
211 Video footage was used to count the number of visible mosquitoes (both flying and landed in the frame  
212 (approximately 1200 × 700 mm field of view, covering the vicinity of the subject's feet and lower legs in  
213 the human-baited treatment) every 30 sec for 10 min, starting at time zero when the participant placed  
214 their feet on the bucket. Numbers of males observed in human-baited and unbaited treatments at 10  
215 min were compared using Wilcoxon signed-rank tests.

216

### 217 **Laboratory olfactometer assays**

218 We compared the attraction of male and female *Ae. aegypti* to a live human host (male, Caucasian, age  
219 31) under confined laboratory conditions. Experiments were performed in a two-port olfactometer (30 ×  
220 30 × 30 cm, Figure 2A) identical to the one used by Ross et al. (2019), except that the stimulus ports  
221 were removed. We performed three treatments: males only, females only and females + males, with  
222 each treatment replicated eight times. Mosquitoes of both sexes were 6-7d post-emergence, mated,  
223 and sugar-starved for approximately 24 hr. In each treatment, approximately 20 adults per sex were  
224 released into the cage and left to acclimate for 1 min. A box fan placed at the opposite end of the cage  
225 drew air (~0.2 m/s) through two traps into the cage. The hand of a human subject was placed 1 cm in  
226 front of one of the traps, with the other blank. Sides were alternated each replicate. After 5 min, the  
227 entrances to both traps were closed and the number of males and/or females in each trap as well as the  
228 cage were counted. Mosquitoes that were damaged before or during the experiment were excluded.  
229 Proportions of males collected in stimulus and blank traps after 5 min were compared using Wilcoxon  
230 signed-rank tests.

231

232

### 233 **Acknowledgements**

234 We thank Tom Swan for assistance with the videography experiment and Verily for providing consent to  
235 use the male *Aedes* sound traps in this study. We also thank Nipun Basrur, Leslie Vosshall and Conor  
236 McMeniman for providing valuable feedback on the first version of this manuscript.

237

### 238 **Funding**

239 AAH was supported by the National Health and Medical Research Council (1132412, 1118640,  
240 [www.nhmrc.gov.au](http://www.nhmrc.gov.au)) and the Wellcome Trust (108508, [wellcome.ac.uk](http://wellcome.ac.uk)). The funders had no role in study  
241 design, data collection and analysis, decision to publish, or preparation of the manuscript.

242

### 243 **Video legends**

244 **Video 1. Video evidence of male *Aedes aegypti* attraction to humans.** Male *Ae. aegypti* are shown  
245 swarming around the legs of human subject A (left) in representative footage from the videography



246 experiment. No activity is seen in the unbaited control (right). Videos have been cropped for clarity;  
247 unedited footage from treatments and controls of both subjects are provided in Videos S1-S4.

248

#### 249 **Supplementary information**

250 **Video S1.** Representative footage from the human-baited treatment for subject A in the videography  
251 experiment. This footage was used to quantify male *Aedes aegypti* attraction to humans in Figure 1C.

252 **Video S2.** Representative footage from the unbaited treatment for subject A in the videography  
253 experiment. This footage was used to quantify male *Aedes aegypti* attraction to humans in Figure 1C.

254 **Video S3.** Representative footage from the human-baited treatment for subject B in the videography  
255 experiment. This footage was used to quantify male *Aedes aegypti* attraction to humans in Figure 1C.

256 **Video S4.** Representative footage from the unbaited treatment for subject B in the videography  
257 experiment. This footage was used to quantify male *Aedes aegypti* attraction to humans in Figure 1C.

258

259 AMOS, B. A., RITCHIE, S. A. & CARDÉ, R. T. 2020. Attraction versus capture II: Efficiency of the BG-  
260 Sentinel trap under semifield conditions and characterizing response behaviors of male *Aedes*  
261 *aegypti* (Diptera: Culicidae). *J Med Ent*, 57, 1539-1549.

262 BANKS, C. S. 1908. Biology of Philippine Culicidae. *Philipp J Sci A*, 3, 235-258.

263 BARREDO, E. & DEGENNARO, M. 2020. Not just from blood: Mosquito nutrient acquisition from nectar  
264 sources. *Trends Parasitol*, 36, 473-484.

265 BASRUR, N. S., DE OBALDIA, M. E., MORITA, T., HERRE, M., VON HEYNITZ, R. K., TSITOHAY, Y. N. &  
266 VOSSHALL, L. B. 2020. *fruitless* mutant male mosquitoes gain attraction to human odor. *eLife*, 9,  
267 e63982.

268 CABRERA, M. & JAFFE, K. 2007. An aggregation pheromone modulates lekking behavior in the vector  
269 mosquito *Aedes aegypti* (Diptera: Culicidae). *J Am Mosq Control Assoc*, 23, 1-10, 10.

270 CARVALHO, D. O., MCKEMEY, A. R., GARZIERA, L., LACROIX, R., DONNELLY, C. A., ALPHEY, L., MALAVASI,  
271 A. & CAPURRO, M. L. 2015. Suppression of a field population of *Aedes aegypti* in Brazil by  
272 sustained release of transgenic male mosquitoes. *PLoS Negl Trop Dis*, 9, e0003864.

273 CATOR, L. J., ARTHUR, B. J., HARRINGTON, L. C. & HOY, R. R. 2009. Harmonic convergence in the love  
274 songs of the dengue vector mosquito. *Science*, 323, 1077-1079.

275 CATOR, L. J., ARTHUR, B. J., PONLAWAT, A. & HARRINGTON, L. C. 2011. Behavioral observations and  
276 sound recordings of free-flight mating swarms of *Ae. aegypti* (Diptera: Culicidae) in Thailand. *J*  
277 *Med Ent*, 48, 941-946.

278 CRAWFORD, J. E., CLARKE, D. W., CRISWELL, V., DESNOYER, M., CORNEL, D., DEEGAN, B., GONG, K.,  
279 HOPKINS, K. C., HOWELL, P., HYDE, J. S., LIVNI, J., BEHLING, C., BENZA, R., CHEN, W., DOBSON, K.  
280 L., ELDERSHAW, C., GREELEY, D., HAN, Y., HUGHES, B., KAKANI, E., KARBOWSKI, J., KITCHELL, A.,  
281 LEE, E., LIN, T., LIU, J., LOZANO, M., MACDONALD, W., MAINS, J. W., METLITZ, M., MITCHELL, S.  
282 N., MOORE, D., OHM, J. R., PARKES, K., PORSHNIKOFF, A., ROBUCK, C., SHERIDAN, M., SOBECKI,  
283 R., SMITH, P., STEVENSON, J., SULLIVAN, J., WASSON, B., WEAKLEY, A. M., WILHELM, M., WON,  
284 J., YASUNAGA, A., CHAN, W. C., HOLEMAN, J., SNOAD, N., UPSON, L., ZHA, T., DOBSON, S. L.,  
285 MULLIGAN, F. S., MASSARO, P. & WHITE, B. J. 2020. Efficient production of male *Wolbachia*-

- 286 infected *Aedes aegypti* mosquitoes enables large-scale suppression of wild populations. *Nat*  
287 *Biotechnol*, 38, 482-492.
- 288 FAWAZ, E. Y., ALLAN, S. A., BERNIER, U. R., OBENAUER, P. J. & DICLARO, J. W. 2014. Swarming  
289 mechanisms in the yellow fever mosquito: aggregation pheromones are involved in the mating  
290 behavior of *Aedes aegypti*. *J Vector Ecol*, 39, 347-354.
- 291 GUBLER, D. J. & BHATTACHARYA, N. C. 1972. Swarming and mating of *Aedes (S.) albopictus* in nature.  
292 *Mosq News*, 32, 219-223.
- 293 HARRINGTON, L. C., EDMAN, J. D. & SCOTT, T. W. 2001. Why do female *Aedes aegypti* (Diptera:  
294 Culicidae) feed preferentially and frequently on human blood? *J Med Ent*, 38, 411-422.
- 295 HARTBERG, W. 1971. Observations on the mating behaviour of *Aedes aegypti* in nature. *Bull World*  
296 *Health Organ*, 45, 847.
- 297 KUNO, G. 2010. Early history of laboratory breeding of *Aedes aegypti* (Diptera: Culicidae) focusing on the  
298 origins and use of selected strains. *J Med Entomol*, 47, 957-71.
- 299 LAU, M. J., ENDERSBY-HARSHMAN, N. M., AXFORD, J. K., RITCHIE, S. A., HOFFMANN, A. A. & ROSS, P. A.  
300 2020. Measuring the host-seeking ability of *Aedes aegypti* destined for field release. *Am J Trop*  
301 *Med Hyg*, 102, 223-231.
- 302 LIU, M. Z. & VOSSHALL, L. B. 2019. General visual and contingent thermal cues interact to elicit  
303 attraction in female *Aedes aegypti* mosquitoes. *Curr Biol*, 29, 2250-2257. e4.
- 304 LUMSDEN, W. 1957. The activity cycle of domestic *Aedes (Stegomyia) aegypti* (L.) (Dipt., Culicid.) in  
305 southern province, Tanganyika. *Bull Entomol Res*, 48, 769-782.
- 306 MARTINEZ, J., SHOWERING, A., OKE, C., JONES, R. T. & LOGAN, J. G. 2021. Differential attraction in  
307 mosquito-human interactions and implications for disease control. *Philos Trans R Soc Lond B Biol*  
308 *Sci*, 376, 20190811.
- 309 MCBRIDE, C. S., BAIER, F., OMONDI, A. B., SPITZER, S. A., LUTOMIAH, J., SANG, R., IGNEILL, R. &  
310 VOSSHALL, L. B. 2014. Evolution of mosquito preference for humans linked to an odorant  
311 receptor. *Nature*, 515, 222-7.
- 312 MCCLELLAND, G. 1960. Observations on the mosquito, *Aedes (Stegomyia) aegypti* (L.), in East Africa.  
313 II.—The biting cycle in a domestic population on the Kenya coast. *Bull Entomol Res*, 50, 687-696.
- 314 MCMENIMAN, C. J., CORFAS, R. A., MATTHEWS, B. J., RITCHIE, S. A. & VOSSHALL, L. B. 2014. Multimodal  
315 integration of carbon dioxide and other sensory cues drives mosquito attraction to humans. *Cell*,  
316 156, 1060-71.
- 317 MENDA, G., NITZANY, E. I., SHAMBLE, P. S., WELLS, A., HARRINGTON, L. C., MILES, R. N. & HOY, R. R.  
318 2019. The long and short of hearing in the mosquito *Aedes aegypti*. *Curr Biol*, 29, 709-714 e4.
- 319 PEACH, D. A. H., GRIES, R., ZHAI, H., YOUNG, N. & GRIES, G. 2019. Multimodal floral cues guide  
320 mosquitoes to tansy inflorescences. *Sci Rep*, 9, 3908.
- 321 PITTS, R. J., MOZŪRAITIS, R., GAUVIN-BIALECKI, A. & LEMPÉRIÈRE, G. 2014. The roles of kairomones,  
322 synomones and pheromones in the chemically-mediated behaviour of male mosquitoes. *Acta*  
323 *Trop*, 132, S26-S34.
- 324 POMBI, M., JACOBS, F., VERHULST, N. O., CAPUTO, B., DELLA TORRE, A. & TAKKEN, W. 2014. Field  
325 evaluation of a novel synthetic odour blend and of the synergistic role of carbon dioxide for  
326 sampling host-seeking *Aedes albopictus* adults in Rome, Italy. *Parasit Vectors*, 7, 580.
- 327 RITCHIE, S. A., JOHNSON, P. H., FREEMAN, A. J., ODELL, R. G., GRAHAM, N., DEJONG, P. A., STANDFIELD,  
328 G. W., SALE, R. W. & O'NEILL, S. L. 2011. A secure semi-field system for the study of *Aedes*  
329 *aegypti*. *PLoS Negl Trop Dis*, 5, e988.
- 330 ROIZ, D., DUPERIER, S., ROUSSEL, M., BOUSSÈS, P., FONTENILLE, D., SIMARD, F. & PAUPY, C. 2015.  
331 Trapping the tiger: Efficacy of the novel BG-Sentinel 2 with several attractants and carbon  
332 dioxide for collecting *Aedes albopictus* (Diptera: Culicidae) in southern France. *J Med Ent*, 53,  
333 460-465.

- 334 ROSS, P. A., LAU, M. J. & HOFFMANN, A. A. 2019. Does membrane feeding compromise the quality of  
335 *Aedes aegypti* mosquitoes? *PLoS One*, 14, e0224268.
- 336 STAUNTON, K. M., CRAWFORD, J. E., LIU, J., TOWNSEND, M., HAN, Y., DESNOYER, M., HOWELL, P.,  
337 XIANG, W., BURKOT, T. R., SNOAD, N. & RITCHIE, S. A. 2021. A low-powered and highly selective  
338 trap for male *Aedes* (Diptera: Culicidae) surveillance: The male *Aedes* sound trap. *J Med*  
339 *Entomol*, 58, 408-415.
- 340 TRPIS, M., MCCLELLAND, G., GILLETT, J., TEESDALE, C. & RAO, T. 1973. Diel periodicity in the landing of  
341 *Aedes aegypti* on man. *Bull World Health Organ*, 48, 623.
- 342 VAN BREUGEL, F., RIFFELL, J., FAIRHALL, A. & DICKINSON, M. H. 2015. Mosquitoes use vision to associate  
343 odor plumes with thermal targets. *Curr Biol*, 25, 2123-2129.
- 344 VISSER, T. M., DE COCK, M. P., HIWAT, H., WONGSOKARIJO, M., VERHULST, N. O. & KOENRAADT, C. J. M.  
345 2020. Optimisation and field validation of odour-baited traps for surveillance of *Aedes aegypti*  
346 adults in Paramaribo, Suriname. *Parasit Vectors*, 13, 121.
- 347 WHEELWRIGHT, M., WHITTLE, C. R. & RIABININA, O. 2021. Olfactory systems across mosquito species.  
348 *Cell Tissue Res*, 383, 75-90.
- 349 YASUNO, M. & TONN, R. J. 1970. A study of biting habits of *Aedes aegypti* in Bangkok, Thailand. *Bull*  
350 *World Health Organ*, 43, 319.

351
